# Supplementary material for: Evaluation of Microsatellite Typing, ITS Sequencing, AFLP Fingerprinting, MALDI-TOF MS, and Fourier-Transform Infrared Spectroscopy Analysis of Candida auris
Source: MDPI journal article supplement (doi:10.3390/jof6030146), 2020-08-25
Supplement: s1 [file s1]

Supplementary Material

**Supplementary Table 1.** Overview of 96 *Candida auris* strains used in this study is shown in this table. The only discrepancy between the clusters found by other studies and the microsatellite in this study is highlighted by red color. Isolates marked with purple color belonged to cluster IV (South America clade) have shown identical clustering in all five typing methods used in this study compared to the clusters (=clades) obtained from other studies based-molecular techniques. This shows that these isolates are highly genetically identical, but contrary, there is an obvious genetic diversity between these isolates compared to those from the other three clades.

| **Isolate number (a)** | **Other isolate numbers** | **Country** | **Patients country of origin** | **Clades (Clusters) according to other studies (WGS, ITS, Microsatellite)1-3** | **Clusters-according to microsatellite typing results in this study** | **Year of detection (Identification)** |
| --- | --- | --- | --- | --- | --- | --- |
| CDC 381 b | B11220 | Japan | Japan | Cluster II (East Asia clade) | Cluster MS II (East Asia) | 2008 |
| CDC 382 |  | India | India | Cluster I (South Asia clade) | Cluster MS I (South Asia/Middle East) | Unknown |
| CDC 383 | B11221 | South Africa | South Africa | Cluster III (South Africa clade) | Cluster MS III (South Africa/Europe) | 2012 |
| CDC 384 | B11222 | South Africa | South Africa | Cluster III (South Africa clade) | Cluster MS III (South Africa/Europe) | 2012 |
| CDC 385 | B11243 | Venezuela | Venezuela | Cluster IV (South America clade) | Cluster MS IV (South America/Israel) | 2013 |
| CDC 386 | B11244 | Venezuela | Venezuela | Cluster IV (South America clade) | Cluster MS IV (South America/Israel) | 2012 |
| CDC 387 | B11098 | Pakistan | Pakistan | Cluster I (South Asia clade) | Cluster MS I (South Asia/Middle East) | 2014 |
| CDC 388 | B8441 | Pakistan | Pakistan | Cluster I (South Asia clade) | Cluster MS I (South Asia/Middle East) | 2008 |
| CDC 389 |  | India | India | Cluster I (South Asia clade) | Cluster MS I (South Asia/Middle East) | Unknown |
| CDC 390 |  | India | India | Cluster I (South Asia clade) | Cluster MS I (South Asia/Middle East) | Unknown |
| TAU-171103-23 | B11894 | Israel | Israel | Cluster IV (South America clade) | Cluster MS IV (South America/Israel) | 2014 |
| TAU-171103-24 | B11896 | Israel | Israel | Cluster IV (South America clade) | Cluster MS IV (South America/Israel) | 2014 |
| TAU-171103-156 | B11892 | Israel | Israel | Cluster IV (South America clade) | Cluster MS IV (South America/Israel) | 2014 |
| TAU-171103-172 | B11893 | Israel | Israel | Cluster IV (South America clade) | Cluster MS IV (South America/Israel) | 2014 |
| TAU-171103-197 | B11895 | Israel | Israel | Cluster IV (South America clade) | Cluster MS IV (South America/Israel) | 2015 |
| TAU-171103-201 | B11897 | Israel | Israel | Cluster IV (South America clade) | Cluster MS IV (South America/Israel) | 2015 |
| TAU-171103-597 | B11223 | Israel | South Africa | Cluster III (South Africa clade) | Cluster MS III (South Africa/Europe) | 2016 |
| TAU-171103-598 | B11224 | Israel | South Africa | Cluster III (South Africa clade) | Cluster MS III (South Africa/Europe) | 2016 |
| CWZ-10031062 | B11808 (KCTC 17809) | Korea | Korea | Cluster II (East Asia clade) | Cluster MS II (East Asia) | 2009 |
| CWZ-10031063 | B11809 (KCTC 17810) | Korea | Korea | Cluster II (East Asia clade) | Cluster MS II (East Asia) | 2009 |
| CWZ- 10031064 b | B11220 (CDC 381) | Japan | Japan | Cluster II (East Asia clade) | Cluster MS II (East Asia) | 2008 |
| CWZ-10051257 | VPCI 467/P/14 | India | India | Cluster I (South Asia clade) | Cluster MS I (South Asia/Middle East) | 2014 |
| CWZ-10051259 | VPCI 471A/P/14 | India | India | Cluster I (South Asia clade) | Cluster MS I (South Asia/Middle East) | 2014 |
| CWZ-10051262 | VPCI 478/P/14 | India | India | Cluster I (South Asia clade) | Cluster MS I (South Asia/Middle East) | 2014 |
| CWZ-10051266 | VPCI 1133/P/13 | India | India | Cluster I (South Asia clade) | Cluster MS I (South Asia/Middle East) | 2013 |
| CWZ-10051295 |  | India | Unknown | Cluster I (South Asia clade) | Cluster MS I (South Asia/Middle East) | Unknown |
| CWZ-10051297 |  | India | Unknown | Cluster I (South Asia clade) | Cluster MS I (South Asia/Middle East) | Unknown |
| 2MG-A0204-23 | 05-299 | Belgium | Kuwait | Cluster I (South Asia/Middle East clade) | Cluster MS I (South Asia/Middle East) | 2017 |
| CBS 15279 | Repeat of 05-299 | Belgium | Kuwait | Cluster I (South Asia/Middle East clade) | Cluster MS I (South Asia/Middle East) | 2017 |
| CBS 10913 b | JCM 15448 | Japan | Japan | Cluster II (East Asia clade) | Cluster MS II (East Asia) | 2009 |
| CBS 12372 | KCTC 17809 | Korea | Korea | Cluster II (East Asia clade) | Cluster MS II (East Asia) | 2009 |
| CBS 12766 | VPCI669/P/12 | India | India | Cluster I (South Asia clade) | Cluster MS I (South Asia/Middle East) | 2012 |
| CBS 12770 | VPCI673/P/12 | India | India | Cluster I (South Asia clade) | Cluster MS I (South Asia/Middle East) | 2012 |
| CBS 12773 | VPCI 677/P/12 | India | India | Cluster I (South Asia clade) | Cluster MS I (South Asia/Middle East) | 2012 |
| CBS 12775 | VPCI 709/P/12 | India | India | Cluster I (South Asia clade) | Cluster MS I (South Asia/Middle East) | 2012 |
| CBS 12776 | VPCI711/P/12 | India | India | Cluster I (South Asia clade) | Cluster MS I (South Asia/Middle East) | 2012 |
| CBS 12777 | VPCI 712/P/12 | India | India | Cluster I (South Asia clade) | Cluster MS I (South Asia/Middle East) | 2012 |
| CBS 12805 | VPCI 683/p/12 | India | India | Cluster I (South Asia clade) | Cluster MS I (South Asia/Middle East) | 2012 |
| CBS 12806 | VPCI 692/p/12 | India | India | Cluster I (South Asia clade) | Cluster MS I (South Asia/Middle East) | 2012 |
| CBS 12876 | VPCI473 | India | India | Cluster I (South Asia clade) | Cluster MS I (South Asia/Middle East) | 2012 |
| CBS 12877 | VPCI474 | India | India | Cluster I (South Asia clade) | Cluster MS I (South Asia/Middle East) | 2012 |
| CBS 14916 |  | Oman | Oman | Cluster I (South Asia/Middle East clade) | Cluster MS I (South Asia/Middle East) | 2017 |
| CBS 14918 |  | Oman | Oman | Cluster I (South Asia/Middle East clade) | Cluster MS I (South Asia/Middle East) | 2017 |
| CBS 15108 | 317062126 | Oman | Oman | Cluster I (South Asia/Middle East clade) | Cluster MS I (South Asia/Middle East) | 2017 |
| CBS 15109 | 317052804 | Oman | Oman | Cluster I (South Asia/Middle East clade) | Cluster MS I (South Asia/Middle East) | 2017 |
| CBS 12767 (B) | VPCI670/P/12 | India | India | Cluster I (South Asia clade) | Cluster MS I (South Asia/Middle East) | 2012 |
| CBS 12767 (W) | VPCI670/P/12 | India | India | Cluster I (South Asia clade) | Cluster MS I (South Asia/Middle East) | 2012 |
| CBS 12768 (B) | VPCI671/P/12 | India | India | Cluster I (South Asia clade) | Cluster MS I (South Asia/Middle East) | 2012 |
| CBS 12768 (W) | VPCI671/P/12 | India | India | Cluster I (South Asia clade) | Cluster MS I (South Asia/Middle East) | 2012 |
| CBS 12769 (B) | VPCI672/P/12 | India | India | Cluster I (South Asia clade) | Cluster MS I (South Asia/Middle East) | 2012 |
| CBS 12769 (W) | VPCI672/P/12 | India | India | Cluster I (South Asia clade) | Cluster MS I (South Asia/Middle East) | 2012 |
| CBS 12771 (B) | VPCI674/P/12 | India | India | Cluster I (South Asia clade) | Cluster MS I (South Asia/Middle East) | 2012 |
| CBS 12771 (W) | VPCI674/P/12 | India | India | Cluster I (South Asia clade) | Cluster MS I (South Asia/Middle East) | 2012 |
| CBS 12772 (B) | VPCI676/P/12 | India | India | Cluster I (South Asia clade) | Cluster MS I (South Asia/Middle East) | 2012 |
| CBS 12772 (W) | VPCI676/P/12 | India | India | Cluster I (South Asia clade) | Cluster MS I (South Asia/Middle East) | 2012 |
| CBS 12774 (B) | VPCI708/P/12 | India | India | Cluster I (South Asia clade) | Cluster MS I (South Asia/Middle East) | 2012 |
| CBS 12774 (W) | VPCI708/P/12 | India | India | Cluster I (South Asia clade) | Cluster MS I (South Asia/Middle East) | 2012 |
| CBS 15366 |  | Austria | Turkey | Cluster I (South Asia clade) | Cluster MS I (South Asia/Middle East) | 2018 |
| CBS 12874 | VPCI471 | India | India | Cluster I (South Asia clade) | Cluster MS I (South Asia/Middle East) | 2012 |
| CBS 12875 | VPCI472 | India | India | Cluster I (South Asia clade) | Cluster MS I (South Asia/Middle East) | 2012 |
| CBS 12878 | VPCI475 | India | India | Cluster I (South Asia clade) | Cluster MS I (South Asia/Middle East) | 2012 |
| CBS 12880 | VPCI477 | India | India | Cluster I (South Asia clade) | Cluster MS I (South Asia/Middle East) | 2012 |
| CBS 12881 | VPCI478 | India | India | Cluster I (South Asia clade) | Cluster MS I (South Asia/Middle East) | 2012 |
| CBS 12882 | VPCI479 | India | India | Cluster I (South Asia clade) | Cluster MS I (South Asia/Middle East) | 2012 |
| CBS 12886 | VPCI483 | India | India | Cluster I (South Asia clade) | Cluster MS I (South Asia/Middle East) | 2012 |
| 2MG-A0202-071 |  | Spain | Spain | Cluster III (South Africa clade) | Cluster MS III (South Africa/Europe) | 2016 |
| 2MG-A0202-072 |  | Spain | Spain | Cluster III (South Africa clade) | Cluster MS III (South Africa/Europe) | 2016 |
| 2MG-A0202-073 |  | Spain | Spain | Cluster III (South Africa clade) | Cluster MS III (South Africa/Europe) | 2016 |
| 2MG-A0202-074 |  | Spain | Spain | Cluster III (South Africa clade) | Cluster MS III (South Africa/Europe) | 2016 |
| 2MG-A0202-075 |  | Spain | Spain | Cluster III (South Africa clade) | Cluster MS III (South Africa/Europe) | 2016 |
| 2MG-A0202-076 |  | Spain | Spain | Cluster III (South Africa clade) | Cluster MS III (South Africa/Europe) | 2016 |
| 2MG-A0202-077 |  | Spain | Spain | Cluster III (South Africa clade) | Cluster MS III (South Africa/Europe) | 2016 |
| 2MG-A0202-078 |  | Spain | Spain | Cluster III (South Africa clade) | Cluster MS III (South Africa/Europe) | 2016 |
| 2MG-A0202-079 |  | Spain | Spain | Cluster III (South Africa clade) | Cluster MS III (South Africa/Europe) | 2016 |
| 2MG-A0202-080 |  | Spain | Spain | Cluster III (South Africa clade) | Cluster MS III (South Africa/Europe) | 2016 |
| 2MG-A0202-081 |  | Spain | Spain | Cluster III (South Africa clade) | Cluster MS III (South Africa/Europe) | 2016 |
| 2MG-A0202-082 |  | Spain | Spain | Cluster III (South Africa clade) | Cluster MS III (South Africa/Europe) | 2016 |
| 2MG-A0202-083 |  | Spain | Spain | Cluster III (South Africa clade) | Cluster MS III (South Africa/Europe) | 2016 |
| 2MG-A0203-026 | UZ495-18 | Malaysia | Malaysia | Cluster I (South Asia clade) | Cluster MS I (South Asia/Middle East) | 2018 |
| 2MG-A0203-027 | UZ681-18 | Malaysia | Malaysia | Cluster I (South Asia clade) | Cluster MS I (South Asia/Middle East) | 2018 |
| 2MG-A0203-028 | UZ1447-14 | Malaysia | Malaysia | Cluster I (South Asia clade) | Cluster MS I (South Asia/Middle East) | 2014 |
| 2MG-A0203-049 |  | Israel | Israel | Cluster IV (South America clade) | Cluster MS III (South Africa/Europe) | 2017 |
| 2MG-A0203-050 |  | Israel | Israel | Cluster IV (South America clade) | Cluster MS IV (South America/Israel) | 2017 |
| 2MG-A0203-051 |  | Israel | Israel | Cluster IV (South America clade) | Cluster MS IV (South America/Israel) | 2017 |
| 2MG-A0203-098 | SMW.2018.14622 | Switzerland | Switzerland | NA | Cluster MS III (South America/Israel) | 2017 |
| 2MG-A0203-100 |  | Oman | Oman | Cluster I (South Asia/Middle East clade) | Cluster I (South Asia/Middle East) | 2018 |
| 2MG-A0204-001 |  | Oman | Oman | Cluster I (South Asia/Middle East clade) | Cluster I (South Asia/Middle East) | 2018 |
| 2MG-A0204-002 |  | Oman | Oman | Cluster I (South Asia/Middle East clade) | Cluster I (South Asia/Middle East) | 2018 |
| 2MG-A0204-003 |  | Oman | Oman | Cluster I (South Asia/Middle East clade) | Cluster I (South Asia/Middle East) | 2018 |
| 2MG-A0204-004 |  | Oman | Oman | Cluster I (South Asia/Middle East clade) | Cluster I (South Asia/Middle East) | 2018 |
| 2MG-A0204-005 |  | Oman | Oman | Cluster I (South Asia/Middle East clade) | Cluster I (South Asia/Middle East) | 2018 |
| 2MG-A0204-006 |  | Oman | Oman | Cluster I (South Asia/Middle East clade) | Cluster I (South Asia/Middle East) | 2018 |
| 2MG-A0204-007 |  | Oman | Oman | Cluster I (South Asia/Middle East clade) | Cluster I (South Asia/Middle East) | 2018 |
| 2MG-A0204-008 |  | Oman | Oman | Cluster I (South Asia/Middle East clade) | Cluster I (South Asia/Middle East) | 2018 |
| 2MG-A0204-029 |  | Saudi Arabia | Saudi Arabia | Cluster I (South Asia/Middle East clade) | Cluster I (South Asia/Middle East) | 2018 |
| 2MG-A0204-030 |  | Saudi Arabia | Saudi Arabia | Cluster I (South Asia/Middle East clade) | Cluster I (South Asia/Middle East) | 2018 |

1. All tested isolates were identified by MALDI-TOF MS.
2. Type-strain of *C. auris* (= CBS 10913).
3. Muñoz JF, Gade L, Chow NA, Loparev VN, Juieng P, Berkow EL, et al. 2018. Genomic insights into multidrug-resistance, mating and virulence in Candida auris and related emerging species. Nat Commun 9:5346.
4. Prakash A, Sharma C, Singh A, Kumar Singh P, Kumar A, Hagen F, et al. 2016. Evidence of genotypic diversity among Candida auris isolates by multilocus sequence typing, matrix-assisted laser desorption ionization time-of-flight mass spectrometry and amplified fragment length polymorphism. Clin Microbiol Infect Off Publ Eur Soc Clin Microbiol Infect Dis 22:277.e1–9.
5. de Groot T, Puts Y, Berrio I, Chowdhary A, Meis JF. Development of Candida auris Short Tandem Repeat Typing and Its Application to a Global Collection of Isolates. mBio. 2020;11(1):e02971-19. doi: 10.1128/mBio.02971-19.
